# Supplementary material for: Effect of Carbohydrate-Enriched Drink Compared to Fasting on Hemodynamics in Healthy Volunteers. A Randomized Trial
Source: MDPI journal article supplement (doi:10.3390/jcm11030825), 2022-02-04
Supplement: s1 [file s1]

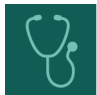

**Table S1.** Comparison of hemodynamical parameters. Values are median (IQR (range)), or mean (SD).

| Variable                                   | 0h                        | 10h                       | 12h                       |                           | <i>p</i> Value<br>(Control vs Pre-op) |
|--------------------------------------------|---------------------------|---------------------------|---------------------------|---------------------------|---------------------------------------|
|                                            | Median (IQR)<br>Mean (SD) | Median (IQR)<br>Mean (SD) | Median (IQR)<br>Mean (SD) | Median (IQR)<br>Mean (SD) |                                       |
|                                            |                           |                           | control                   | pre-op                    |                                       |
| TFC (kOhm <sup>-1</sup> )                  | 35.00<br>(32.43–38.80)    | 33.1<br>(31.3–36.73)      | 32.6<br>(29.4–36.45)      | 32.9<br>(31.15–35.8)      | 0.5020                                |
| TFCI (kOhm <sup>-1</sup> m <sup>-1</sup> ) | 19.82 (3.3)               | 18.86 (3.01)              | 17.8<br>(15.98–20.60)     | 19.25<br>(17.73–20.60)    | 0.2012                                |
| HI (Ohm s <sup>2</sup> )                   | 19.53 (5.82)              | 18.91 (5.79)              | 18.89 (5.80)              | 19.43 (5.41)              | 0.6317                                |
| STR                                        | 0.28<br>(0.26–0.32)       | 0.3<br>(0.27–0.33)        | 0.29<br>(0.27–0.31)       | 0.29<br>(0.26–0.32)       | 0.8837                                |
| STRI (s <sup>-1</sup> )                    | 0.32<br>(0.29–0.38)       | 0.33<br>(0.28–0.39)       | 0.30<br>(0.26–0.34)       | 0.30<br>(0.27–0.35)       | 0.6760                                |

TFC—thoracic fluid content; TFCI—thoracic fluid content index; HI—Heather index; STR—systolic time ratio; STRI—systolic time ratio index.
